# Supplementary material for: Integrated Somatic and Germline Whole-Exome Sequencing Analysis in Women with Lung Cancer after a Previous Breast Cancer
Source: MDPI journal article supplement (doi:10.3390/cancers11040441), 2019-03-28
Supplement: s1 [file s1]

2A

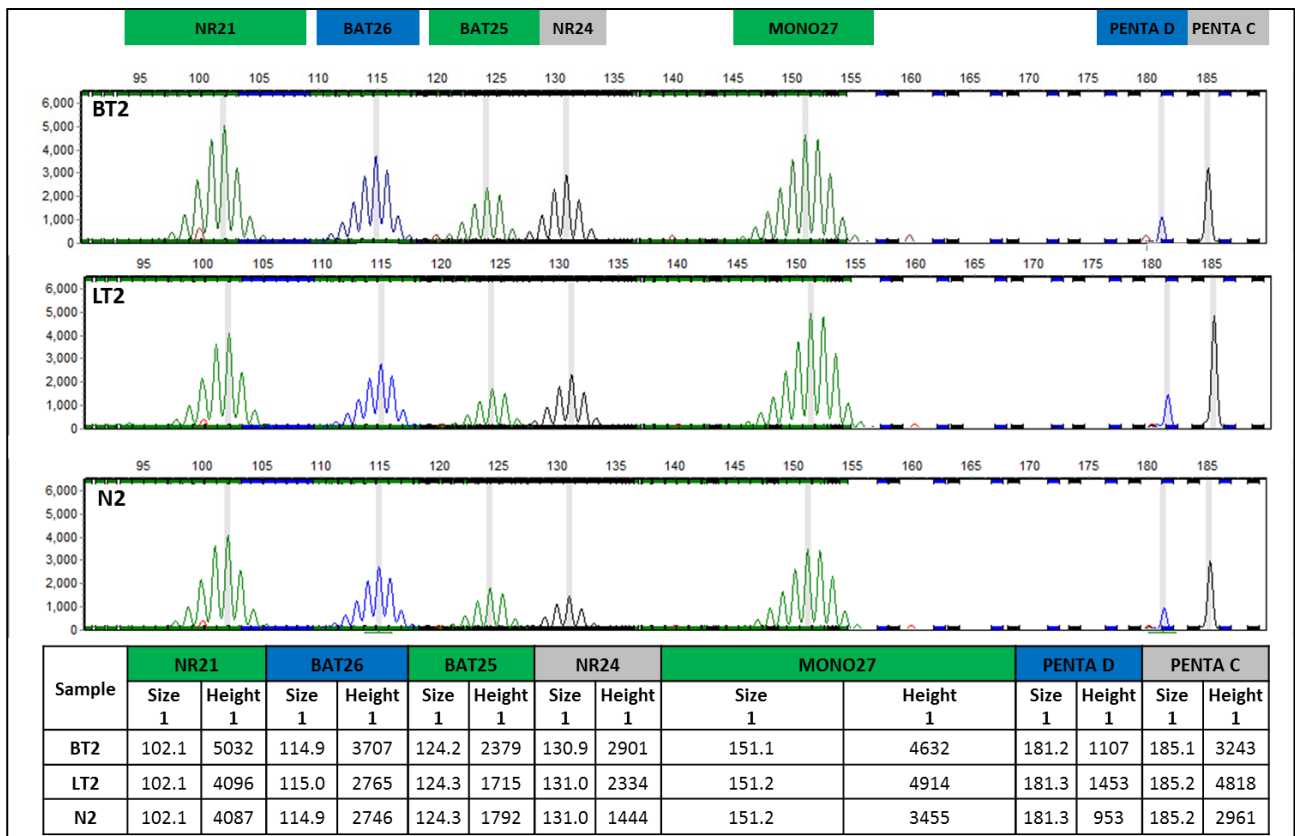

2B

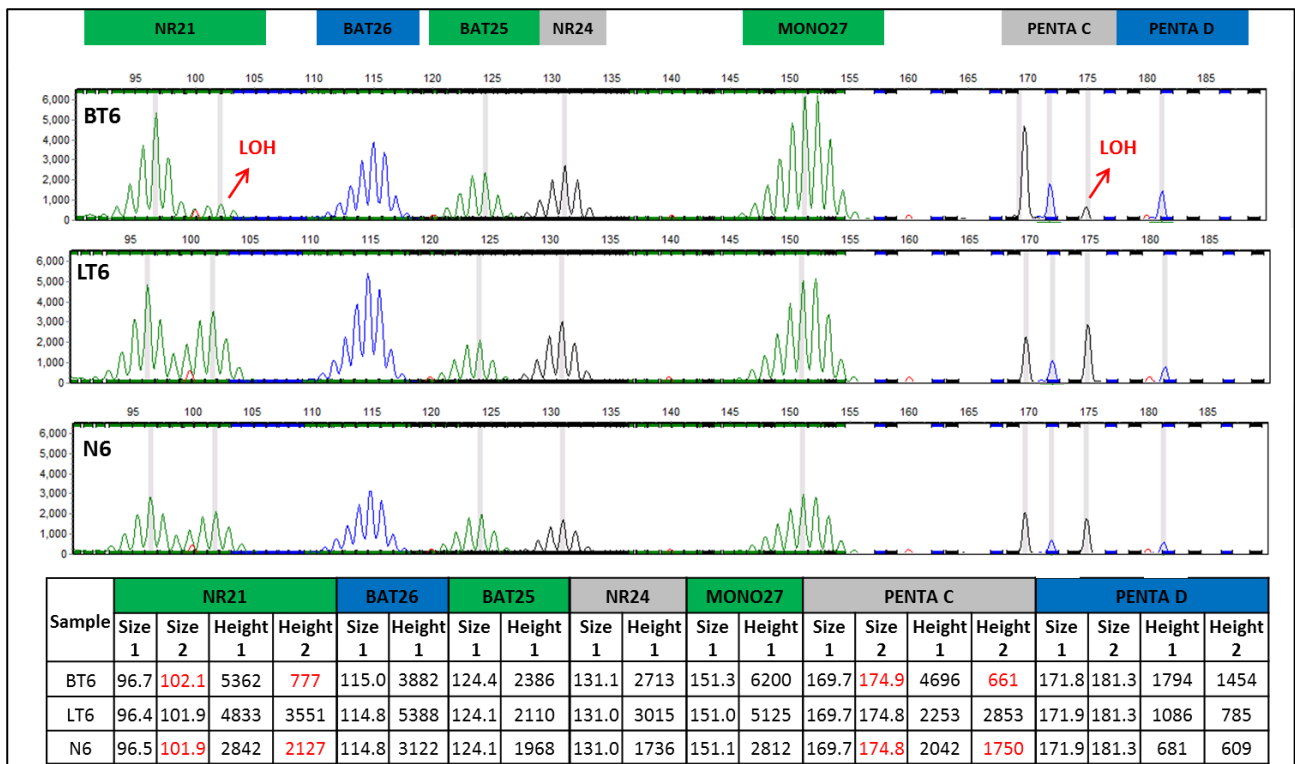

**Figure S2.** Fragment analysis in microsatellite instability. **S2A** Example of a normal asset (no MSI) for all markers in both tumors (BC and LC) compared to the normal tissue. **S2B** Example of allele imbalances in a BC sample.
