# Supplementary material for: Integrated Somatic and Germline Whole-Exome Sequencing Analysis in Women with Lung Cancer after a Previous Breast Cancer
Source: MDPI journal article supplement (doi:10.3390/cancers11040441), 2019-03-28
Supplement: s1 [file s1]

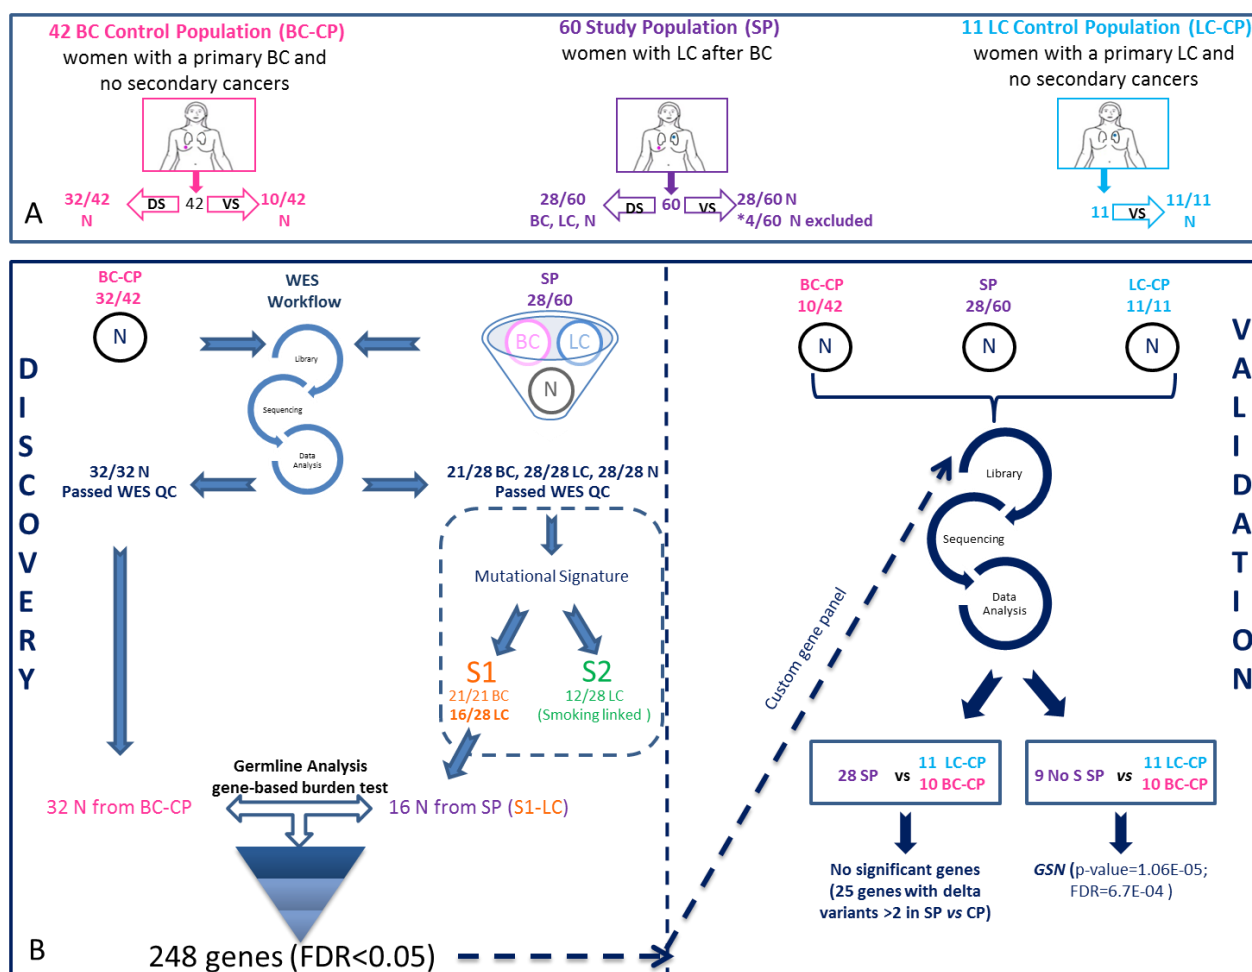

**Figure S1:** Flow chart of study design. The flow chart reports the number of patients (Study Population: SP and Control Population: CP) and types of samples (Breast Cancer: BC; Lung Cancer: LC; Normal tissue: N) (Panel A) involved in each analysis (whole exome sequencing: WES; next generation sequencing (NGS) custom panel) (Panel B).

*Abbreviations:* DS: discovery set; FDR: false discovery rate; QC: quality control; S: mutational signature; vs: versus; VS: validation set; WES: whole exome sequencing.
